# Supplementary material for: PD-1 independent of PD-L1 ligation promotes glioblastoma growth through the NFκB pathway
Source: PubMed Central journal article supplement — Sci Adv. 2021 Nov 5;7(45):eabh2148. doi: 10.1126/sciadv.abh2148 (PMC8570610; doi:10.1126/sciadv.abh2148), 2021-11-05
Supplement: sciadv.abh2148_sm.pdf [file sciadv.abh2148_sm.pdf]

Supplementary Materials for  
**PD-1 independent of PD-L1 ligation promotes glioblastoma growth through  
the NF $\kappa$ B pathway**

Reza Mirzaei, Ashley Gordon, Franz J. Zemp, Mehul Kumar, Susobhan Sarkar,  
H. Artee Luchman, Anita C. Bellail, Chunhai Hao, Douglas J. Mahoney, Jeff F. Dunn,  
Pinaki Bose, V. Wee Yong\*

\*Corresponding author. Email: [vyong@ucalgary.ca](mailto:vyong@ucalgary.ca)

Published 5 November 2021, *Sci. Adv.* 7, eabh2148 (2021)

DOI: [10.1126/sciadv.abh2148](https://doi.org/10.1126/sciadv.abh2148)

**The PDF file includes:**

Figs. S1 to S6  
Tables S1 and S2  
Legend for data file S1

**Other Supplementary Material for this manuscript includes the following:**

Data file S1

Figure S1, Related to Figure 1

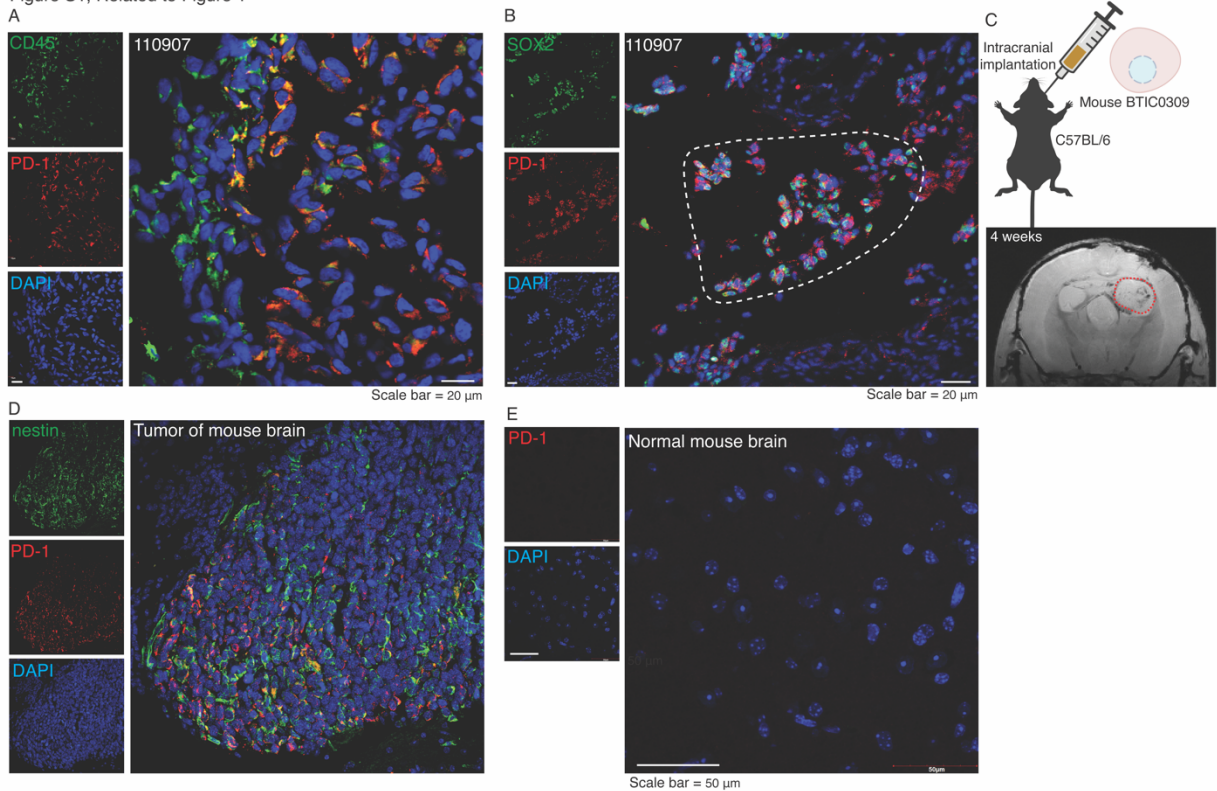

**Fig. S1. The expression of PD-1 within the tumor microenvironment of human and mouse model of GBM, Related to Fig. 1.** (A) Representative image of immunofluorescence staining of CD45 and PD-1 in tissue sections from human GBM patient 110907. (B) Confirmation of PD-1 expression on SOX2-positive BTICs by immunofluorescence staining of human GBM patient 110907 with a different monoclonal antibody (Clone UMAB199). Dotted outline corresponds to the area where there are PD-1 and SOX2 double positive cells. Nuclei were counterstained with DAPI. (C) Schematic diagram depicts the procedure of mouse intracranial implantation and follow-up magnetic resonance imaging (MRI). (D) Representative images of immunofluorescence staining of BTIC marker nestin, and PD-1 in a section of mouse

tumor. (E) Representative images of immunofluorescence staining of PD-1 in normal brain collected from naïve C57BL/6 mice.

Figure S2, Related to Figure 2

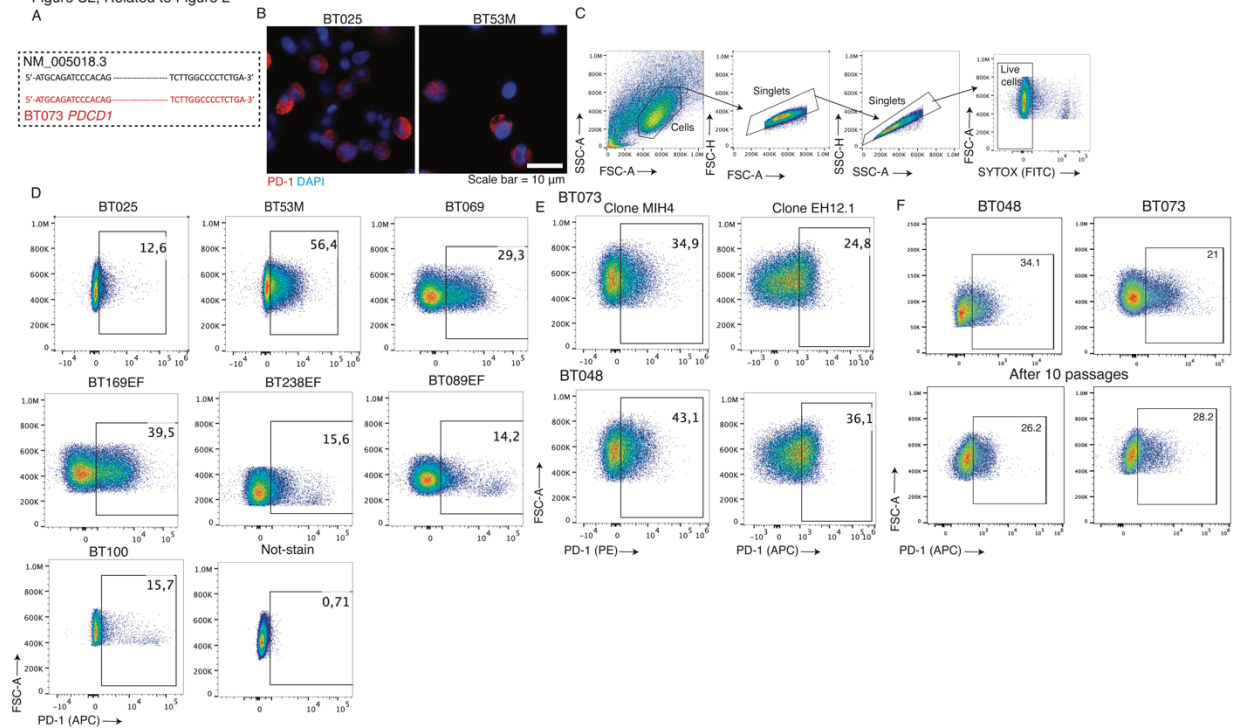

**Fig. S2. The expression of PD-1 on human BTICs derived from GBM patients, related to Fig. 2.** (A) Alignment of coding sequence (CDS) of *PDCD1* transcripts obtained from human BT073 with the NCBI Reference Sequence: NM\_005018.3. Same results were generated for GBM5 and BT025 cell lines (not shown). (B) Representative immunofluorescence images of PD-1 staining of human BT025 and BT53M. Nuclei were counterstained with DAPI. (C) Flow cytometry gating strategy. Forward scatter-versus side scatter-area (FSC-A vs SSC-A) gating was used to identify cells of interest based on size (FSC-A) and granularity (SSC-A) and exclude debris. By using two-step gating of FSC-A vs FSC-height (FSC-H) and SSC-A vs SSC-height (SSC-H), we eliminated doublet cells from our analysis. Finally, dead cells were gated out by staining them with SYTOX green (FITC) nucleic acid stain. (D) Representative flow cytometry plots of surface PD-1 expression on different patient-derived BTIC lines. (E) Flow

cytometry plots of surface PD-1 expression employing two monoclonal antibodies from different clones, MIH4 and EH12.1. (F) Flow cytometry analysis of PD-1 expression on BT048 and BT073 before and after 10 passages in culture. All images and graphs representative of 2-3 independent experiments.

Figure S3, Related to Figure 2

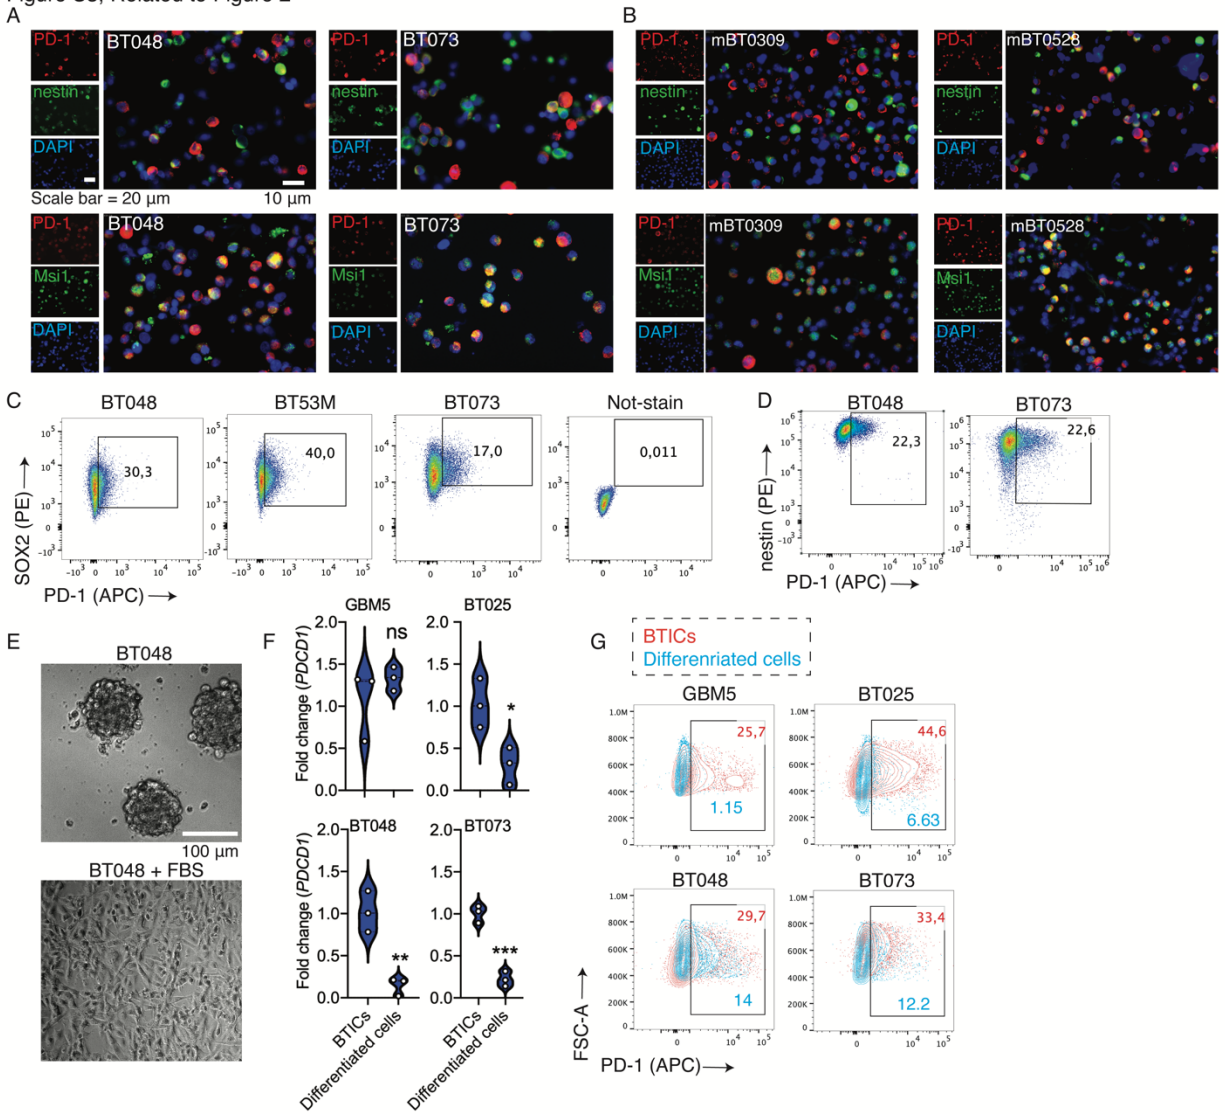

**Fig. S3. The coexpression of PD-1 and stemness markers on mouse and human**

**BTIC lines, Related to Fig. 2. (A, B) Immunofluorescence images of human and**

**mouse BTIC lines double stained for PD-1 and BTIC markers musashi1 (Msi1) or**

**nestin. Nuclei were counterstained with DAPI. (C, D) Representative flow cytometry**

**plots of co-expression of PD-1 and stemness marker SOX2 or nestin on patient-derived**

**BTIC lines. (E) Images of BTICs taken using a brightfield microscope before and one**

**week after they were exposed to 1% fetal bovine serum (FBS). (F) RT-qPCR analysis of**

*PDCD1* mRNA expression in differentiated cells compared with undifferentiated counterparts of four human BTIC lines. (G) Flow cytometry plots of PD-1 expression in differentiated cells versus undifferentiated counterparts of four human BTIC lines. All images and graphs representative of 2-3 separate experiments. Means were compared by Unpaired [two-tailed] t test, \* $p < 0.05$ , \*\* $p < 0.01$ , \*\*\* $p < 0.001$ , \*\*\*\* $p < 0.0001$ . ns, not significant. Data are represented as mean  $\pm$  SEM.

Figure S4, Related to Figure 3

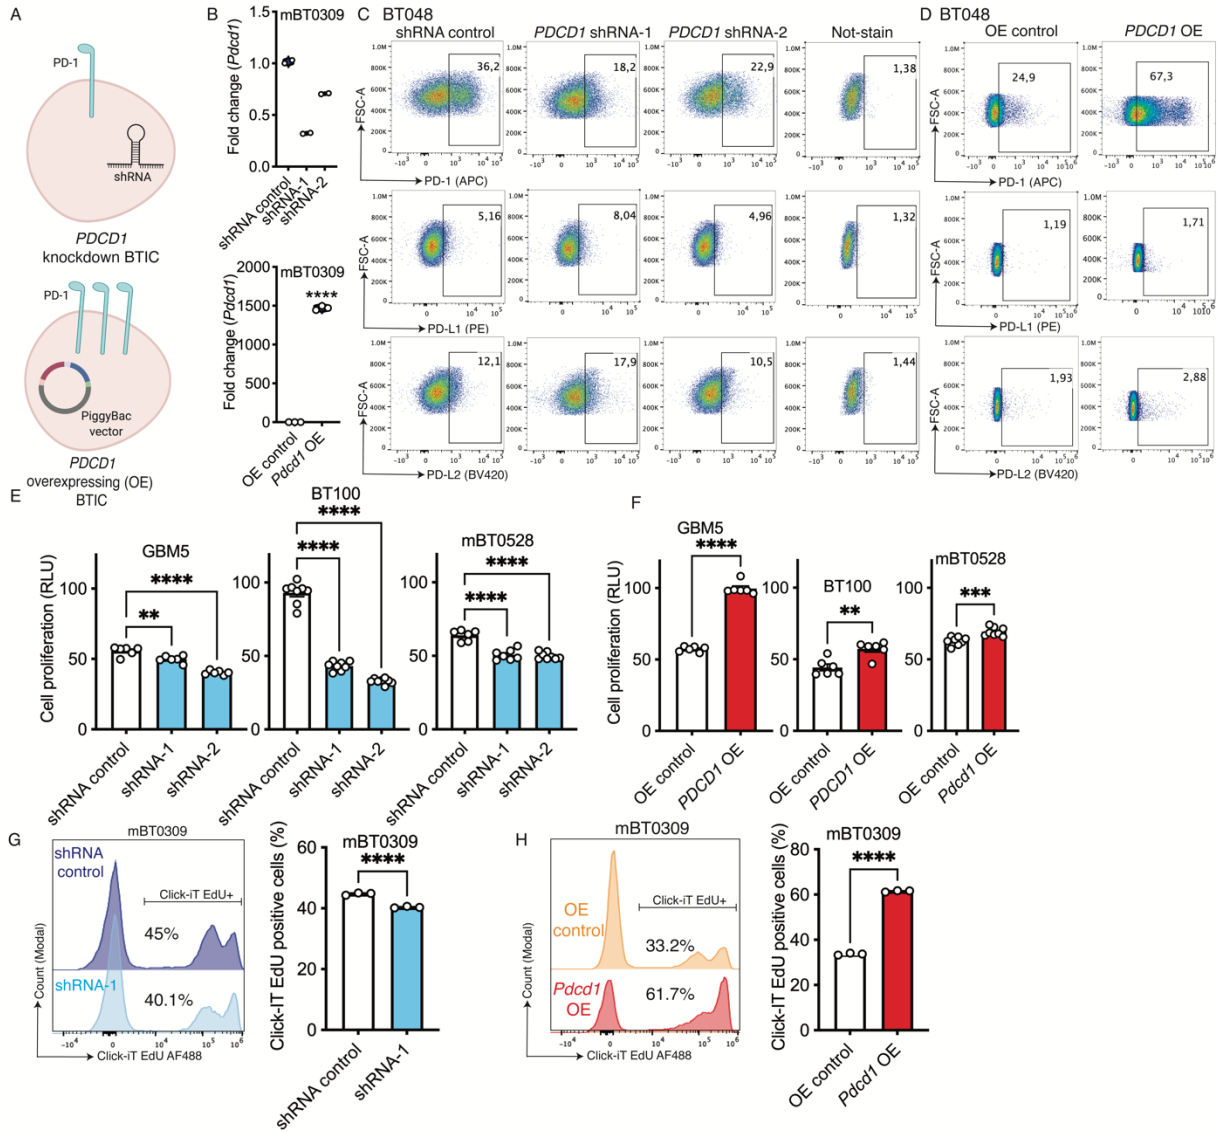

**Fig. S4. PD-1 expression by BTICs promotes BTIC growth, Related to Fig. 3. (A)**

Schematic of generation of stable *PDCD1* knockdown or overexpressing (OE) BTIC lines by shRNAs in lentiviral vector and *PDCD1* encoding constructs in PiggyBac (PB) vector, respectively. Cells transfected with non-target shRNA plasmid or transfected with PiggyBac plasmid were used as controls for knockdown (shRNA control) or overexpressing (OE control) BTICs, respectively. (B) RT-qPCR analysis of *Pdcdf1* expression in mouse BT0309 transfected with downregulating or overexpressing



vectors. Fold changes were calculated relative to *Pdcd1* expression in respective vector controls and normalized to *Gapdh* expression. (C, D) Flow cytometry study of PD-1, PD-L1 and PD-L2 expression on BT048 following PD-1 downregulation or overexpression compared to vector controls. (E, F) Human (GBM5 and BT100) and mouse (BT0528) BTIC lines with PD-1 downregulation or overexpression were compared to respective vector controls in a luminescence ATP proliferation assay. (G, H) Proliferation of a mouse BTIC line with PD-1 downregulation or overexpression measured by detecting EdU incorporation into DNA during the S phase of the cell cycle. Data representative of 2-3 separate experiments. Means were compared to respective vector control by unpaired [two-tailed] t test when comparing two groups. For more than two groups, one-way ANOVA with Tukey's post hoc was used. \*\*p < 0.01, \*\*\*p < 0.001, \*\*\*\*p < 0.0001. Data are represented as mean ± SEM

Figure S5, Related to Figure 4

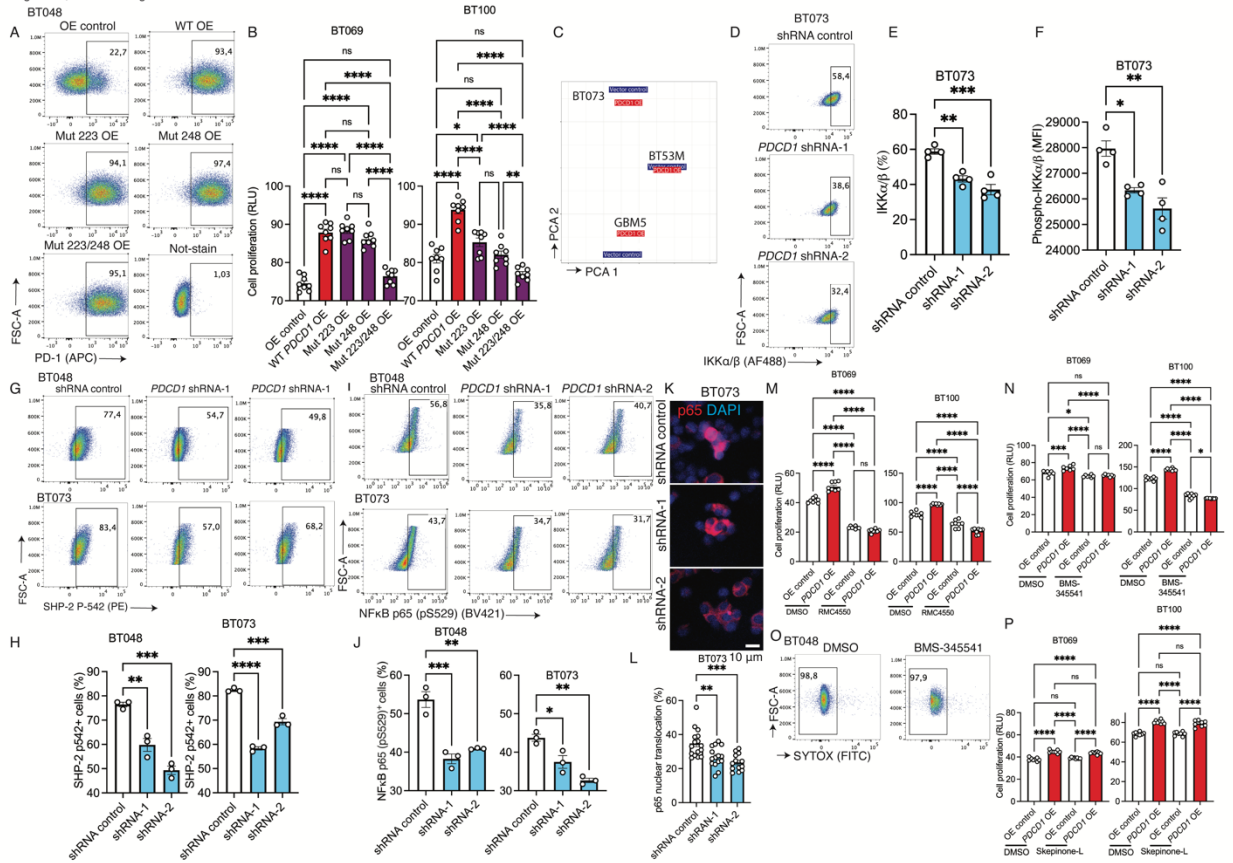

**Fig. S5. PD-1 signaling in BTICs activates NFκB pathway, Related to Fig. 4. (A)**

Flow cytometry plots of PD-1 expression in BT048 transfected with overexpressing vectors encoding wild-type (WT), 223, 248 or 223/248 mutant (Mut) version of PD-1 compared to OE control. (B) ATP proliferation assay of human BT069 and BT100 cells overexpressing WT or mutant versions of PD-1 compared with OE control. (C) Principal components analysis of RNA-seq data of *PDCD1*-overexpressing cells versus OE control of three human BTIC lines. (D) Representative flow cytometry and bar plots of total IKKα/β expression in *PDCD1*-downregulated BTICs versus shRNA control. Alexa Fluor 488 (AF488) labelled antibodies were used to stain the cells. (F) Flow cytometry analysis of phosphorylation of serine residue 176/180 of IKKα or serine residue 177/181 of IKKβ (Phospho-IKKα/β) in *PDCD1*-downregulated BTICs versus shRNA control. MFI:

Mean fluorescence intensity. (G, H) Flow cytometry and bar plots of SHP-2 phosphorylation at tyrosine 542 in human BT048 and BT073 where PD-1 is downregulated by two distinct shRNAs compared with shRNA control. (I, J) Representative flow cytometry and bar plots of phosphorylation at serine residue 529 (pS529) of p65 subunit NF $\kappa$ B transcription factor. (K, L) Analysis of p65 nuclear translocation by immunofluorescence cell staining of *PDCD1*-downregulated BT073 versus shRNA control. For each well of cells, 4 field of views (FOVs) were imaged for quantitative analysis. Luminescence ATP proliferation test of *PDCD1*-overexpressing BT069 and BT100 cells compared to OE controls after 72 hours of treatment with (M) SHP-2 inhibitor RMC4550 (3 M $\mu$ ) or (N) IKK $\alpha/\beta$  inhibitor BMS-345541 (1 M $\mu$ ). (O) Representative flow cytometry plots of viability assay of BT048 treated with IKK $\alpha/\beta$  selective inhibitor BMS-345541 (1  $\mu$ M) for 72 hours. Control cells were treated with dimethyl sulfoxide (DMSO). Dead cells were labeled with SYTOX green nucleic acid stain. (P) ATP proliferation assay of *PDCD1*-overexpressing BT069 and BT100 cells compared to OE controls after 72 hours of treatment with p38-MAPK inhibitor Skepinone-L (1 M $\mu$ ). Results are representative of n = 2-3 independent experiments. One-way ANOVA with Tukey's post hoc was used to compare means across groups. \*p < 0.05, \*\*p < 0.01, \*\*\*p < 0.001, \*\*\*\*p < 0.0001. ns, not significant. Data are represented as mean  $\pm$  SEM

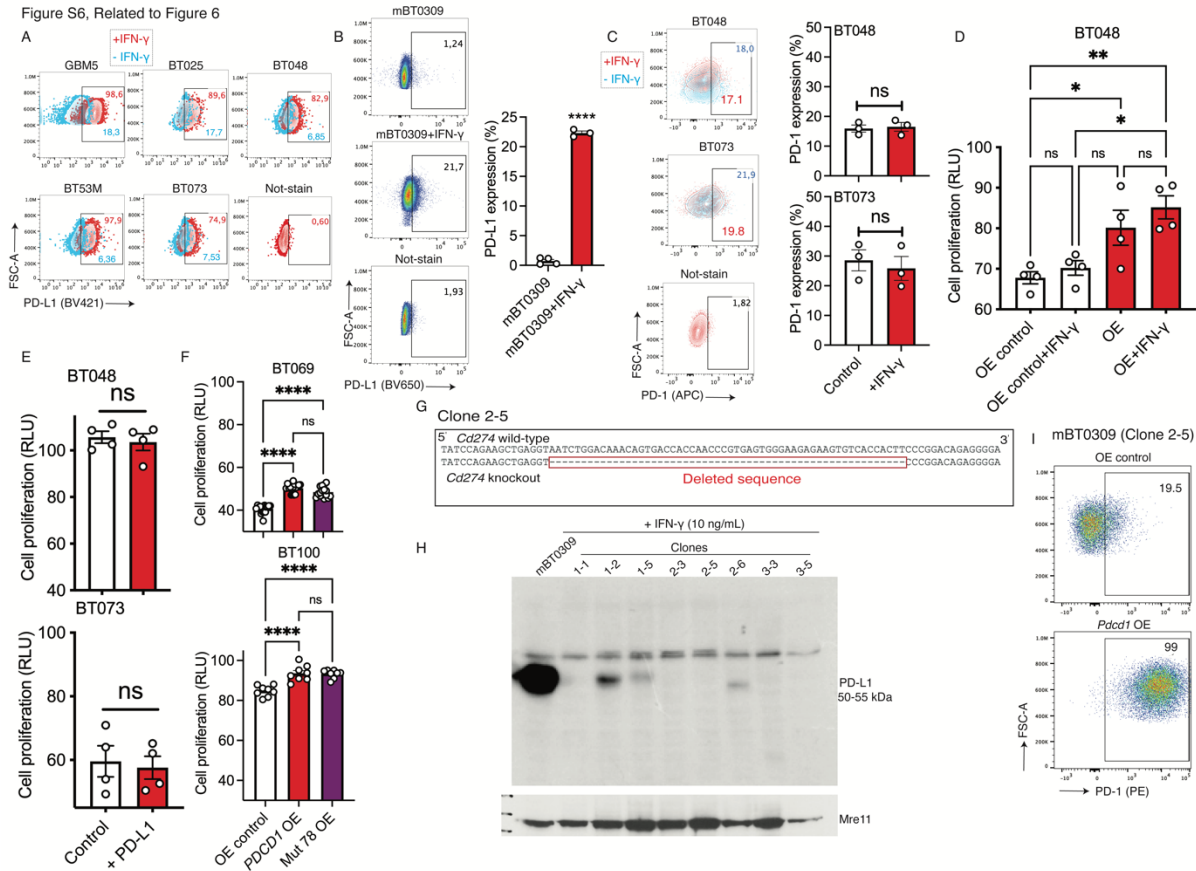

**Fig. S6. BTIC-intrinsic PD-1 independent of PD-L1 ligation promotes tumor growth, Related to Fig. 6.** (A) Representative flow cytometry plots of PD-L1 expression on five human BTIC lines after exposing cells to recombinant IFN- $\gamma$  (10 ng/mL) for 48 hours. (B) Flow cytometry and bar graphs of surface PD-L1 expression on mouse BT0309 following treatment with recombinant IFN- (10 ng/mL). (C) Representative flow cytometry and bar plots of surface PD-1 expression on human BTIC lines BT048 and BT073 after treatment with IFN- $\gamma$ . (D) Luminescence ATP proliferation assay of OE control and *PDCD1*-OE BT048 following treatment with IFN- $\gamma$  for 48 hours. (E) Luminescence ATP proliferation assay of wild-type BT048 and BT073 in the presence or absence of 5  $\mu$ g/mL recombinant human PD-L1 Fc. (F) ATP proliferation assay of two human BTIC lines overexpressing wild-type or mutant version of PD-1 (K78A)

compared to OE control. (G) Sequence of genomic DNA around short guide RNA site in clone 2-5 of mBT0309. Red box shows deleted sequence. (H) Western blot analysis of PD-L1 expression in different clones of *Cd274* knockout mBT0309 generated by CRISPR/Cas9 gene editing system. Cells were treated with IFN- $\gamma$  before protein extraction. Mre11 was used as a loading control. Experiment conducted once. (I) Flow cytometry plots of PD-1 expression in mBT0309 after transfecting *Cd274*-KO cells with *Pdcd1*-OE vector. Means were compared to respective control by unpaired [two-tailed] t test when comparing two groups. For more than two groups, one-way ANOVA with Tukey's post hoc was used, \* $p < 0.05$ , \*\* $p < 0.01$ , \*\*\*\* $p < 0.0001$ . ns, not significant. All plots and graphs representative of 2-3 separate experiments unless otherwise stated. Data are represented as mean  $\pm$  SEM

**Table S1. Patient characterization of specimens resected from clinical samples**

| <b>Patient</b> | <b>IDH</b> | <b>EGFR</b> | <b>PTEN</b> | <b>MGMT</b>          | <b>New or rec*</b> | <b>Gender</b> | <b>Age (year)</b> |
|----------------|------------|-------------|-------------|----------------------|--------------------|---------------|-------------------|
| <b>101029</b>  | Wild type  | Wild type   | Mutant      | Unmethylated         | New                | Male          | 78                |
| <b>101220</b>  | Wild type  | Wild type   | Mutant      | Unmethylated         | New                | Male          | 60                |
| <b>100819</b>  | Wild type  | Mutant      | Mutant      | Unmethylated         | New                | Male          | 54                |
| <b>110907</b>  | Wild type  | Wild type   | Wild type   | Unknown              | AO†                | Female        | 56                |
| <b>110512</b>  | Wild type  | Mutant      | Mutant      | Partially methylated | New                | Male          | 59                |
| <b>1085</b>    | Wild type  | Wild type   | Unknown     | Unknown              | New                | Unknown       | Unknown           |
| <b>026-1</b>   | Wild type  | Wild type   | Unknown     | Unknown              | New                | Unknown       | Unknown           |

\*Recurrent; †Anaplastic oligodendroglioma

**Table S2. Identification of a panel of patient derived BTICs**

| BTIC          | IDH1      | EGFR1             | PTEN         | P53       | MGMT         | New or rec | Treatment                         | Gender  | Age (year) |
|---------------|-----------|-------------------|--------------|-----------|--------------|------------|-----------------------------------|---------|------------|
| <b>GBM5</b>   | Wild type | Wild type         | Mutant       | Mutant    | Unmethylated | New        | Unknown                           | Unknown | 70         |
| <b>BT025</b>  | Wild type | Wild type         | Mutant       | Mutant    | M/U*         | New        | Unknown                           | Male    | 57         |
| <b>BT048</b>  | Wild type | Mutant            | Mutant       | Wild type | Methylated   | New        | No                                | Male    | 68         |
| <b>BT53M</b>  | Wild type | Mutant            | Wild type    | Mutant    | Methylated   | New        | Unknown                           | Male    | 59         |
| <b>BT073</b>  | Wild type | vIII <sup>†</sup> | Mutant       | Mutant    | Unmethylated | Unknown    | Unknown                           | Male    | 52         |
| <b>BT069</b>  | Wild type | Het mutant        | Mutant       | Mutant    | Unmethylated | New        | No                                | Male    | 51         |
| <b>BT089</b>  | Wild type | Wild type         | Wild type    | Wild type | Methylated   | New        | RT <sup>§</sup> +TMZ <sup>¶</sup> | Female  | 60         |
| <b>BT100</b>  | Wild type | Wild type         | Wild type    | Wild type | Unmethylated | New        | No                                | Male    | 63         |
| <b>BT169</b>  | Wild type | Wild type         | Het mutant** | Mutant    | Unknown      | New        | RT+TMZ                            | Male    | 41         |
| <b>BT238</b>  | Wild type | Mutant            | Wild type    | Wild type | Unmethylated | New        | RT+TMZ                            | Male    | 61         |
| <b>BT2313</b> | Wild type | Unknown           | Unknown      | Unknown   | Unmethylated | New        | Unknown                           | Male    | 68         |
| <b>BT2314</b> | Wild type | Unknown           | Unknown      | Unknown   | M/U          | New        | Unknown                           | Male    | 57         |

\*Methylated/Unmethylated; <sup>†</sup>EGFR variant III; <sup>§</sup>Radiation therapy; <sup>¶</sup>Temozolomide;

\*\*Heterozygous mutant

**Data file S1** (Microsoft Excel format). Differential gene expression in human BTIC lines overexpressing PD-1 versus control (raw data).
